# Supplementary material for: Nanoparticle induced formation of self-assembled zwitterionic surfactant microdomains which mimic microemulsions for the in situ fabrication and dispersion of silver nanoparticles
Source: Royal Society of Chemistry journal article supplement (doi:10.1039/d0ra06824a), 2020-01-01
Supplement: d0ra06824a1.pdf [file d0ra06824a1.pdf]

Electronic Supplementary Information (ESI) for *Chemical Communication*

**Nanoparticle induced formation of self-assembled zwitterionic surfactant microdomains which mimic microemulsions for the in situ fabrication and dispersion of silver nanoparticles**

Taichi Nakagawa,<sup>\*a</sup> Akihide Hibara,<sup>b</sup> Willie L. Hinze<sup>c</sup> and Yoshitaka Takagai <sup>\*a</sup>

- a. *Faculty of Symbiotic Systems Science, Cluster of Science and Technology, Fukushima University, 1 Kanayagawa, Fukushima 960-1296, Japan. E-mail: s015@ipc.fukushima-u.ac.jp*
- b. *Institute of Multidisciplinary Research for Advanced Materials, Tohoku University, 2-1-1 Katahira, Aoba-ku, Sendai 980-8577, Japan*
- c. *Department of Chemistry, Wake Forest University, P. O. Box 7486, Winston-Salem, North Carolina 27109, USA. E-mail: hinze@wfu.edu*

\*To whom correspondence should be addressed: s015@ipc.fukushima-u.ac.jp

---

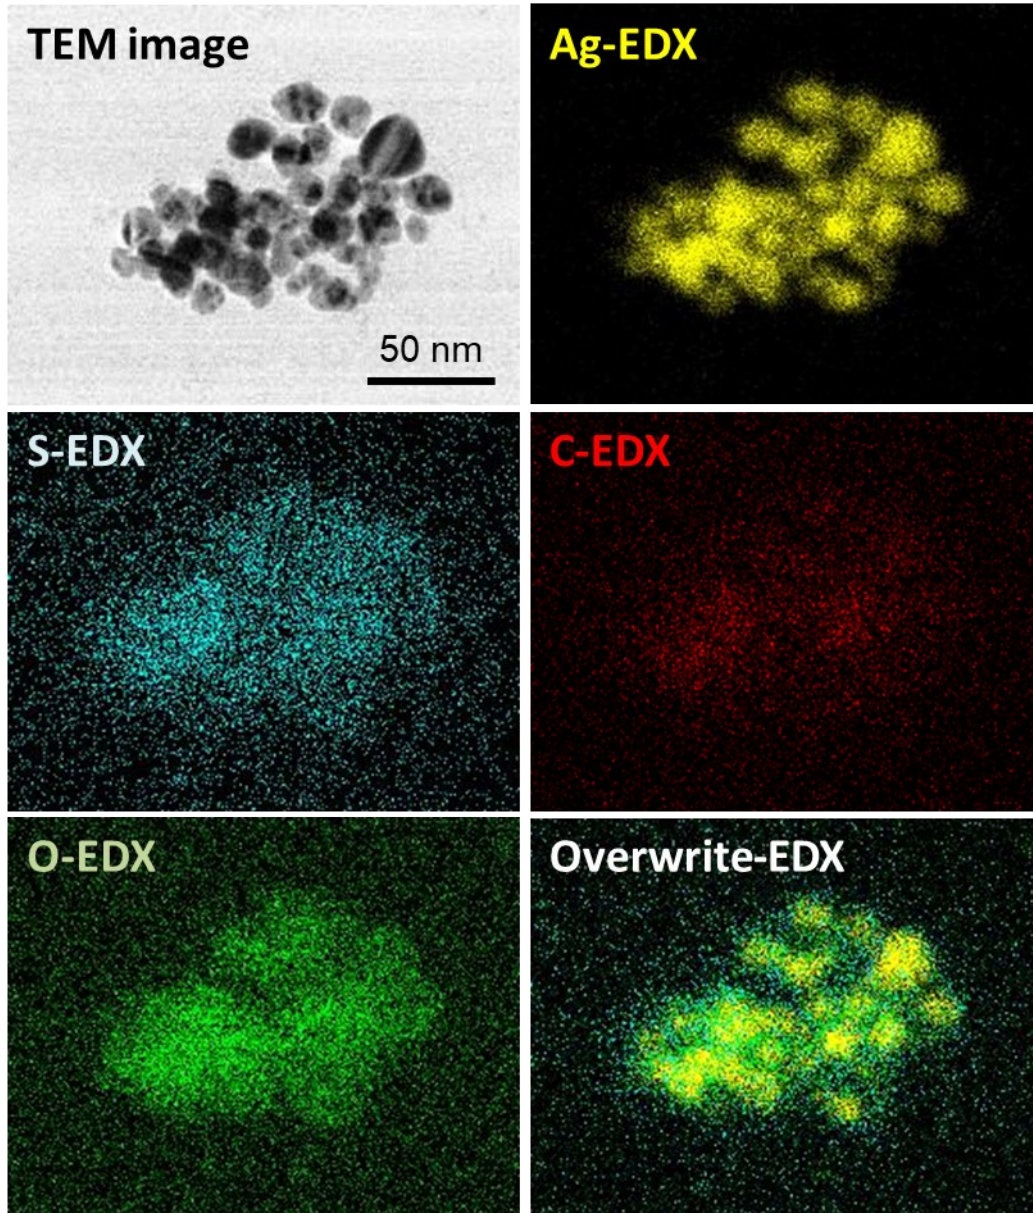

Fig. S1 The elemental mapping in STEM image based on the EDX signal intensity for Ag-NPs in the  $C_{10}$ -APSO<sub>4</sub> ME microdomain.

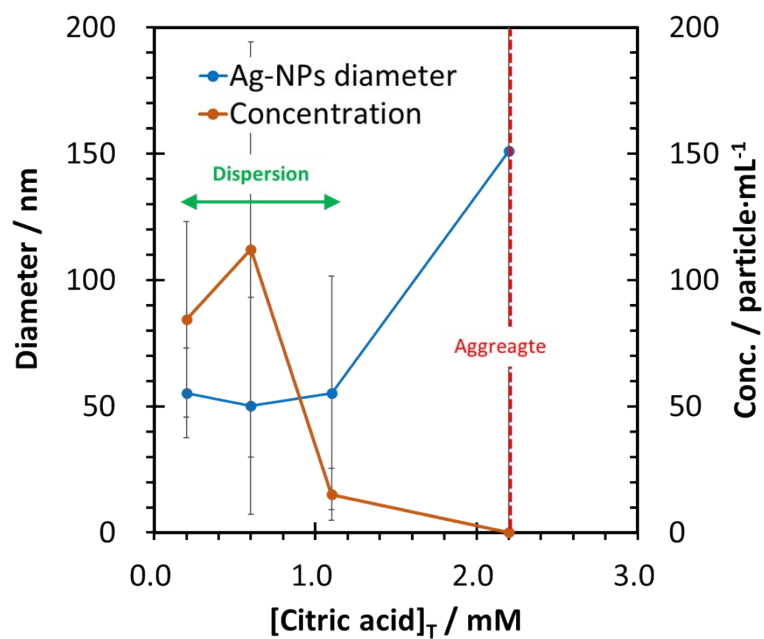

Fig. S2 The impact of citric acid concentration on the diameter of prepared Ag-NPs in ME (blue line) and the concentration of Ag-NPs in ME (orange line). Experimental conditions:  $[C_{10}APSO_4]_T = 0.20\%$  (w/w);  $[AgNO_3]_T = 0.11$  mM; total volume: 2.25 mL; pH = 11; reaction time: 8 min at 108°C; diameters determined by DLS and particle concentrations from TEM images.

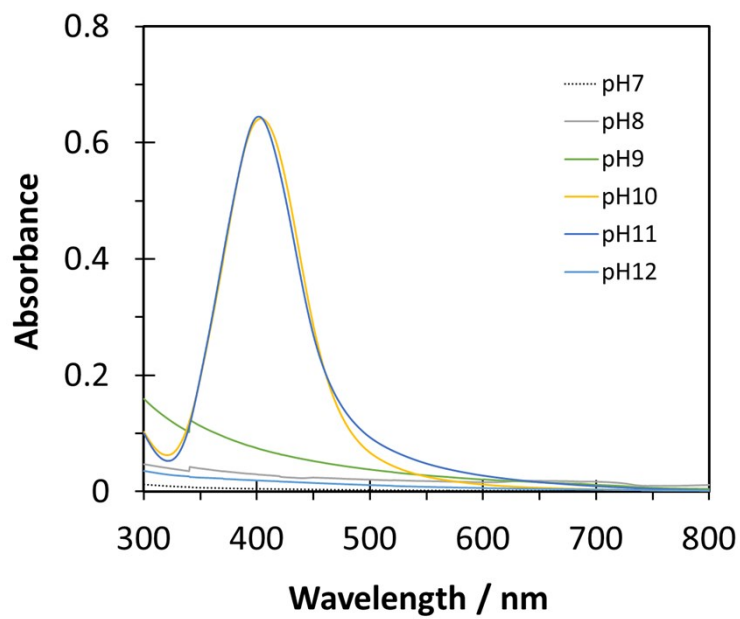

Fig. S3 Absorption spectra of the final solution obtained using the typical synthetic protocol for the reaction conducted at the indicated pH values.

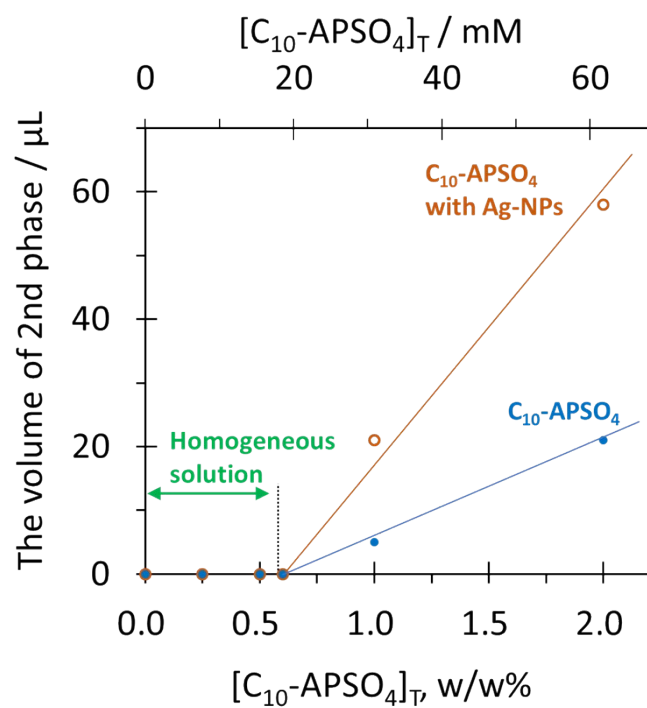

Fig. S4 The relationship between the surfactant concentration and the volume of second surfactant-rich phase that resulted from the phase separation of the thermoresponsive C<sub>10</sub>-APSO<sub>4</sub> surfactant. Blue line obtained for just aqueous C<sub>10</sub>-APSO<sub>4</sub> surfactant solutions; orange line shows the behavior for C<sub>10</sub>-APSO<sub>4</sub> surfactant solutions containing the formed Ag-NPs.

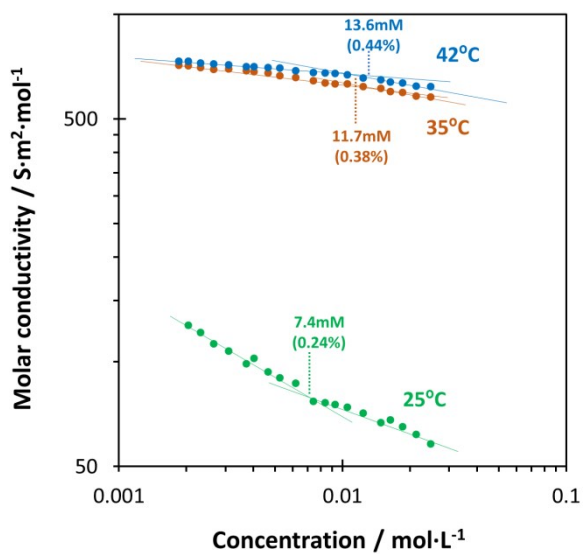

Fig. S5 Relationship between the conductivity and the concentration of  $C_{10}$ -APSO<sub>4</sub> surfactant in aqueous solution (pH = 3) at the indicated temperatures. The CMC values was taken as that at the inflection points in the plots. Note: A similar plot obtained at pH = 11.0 at 25°C yielded the same CMC value.

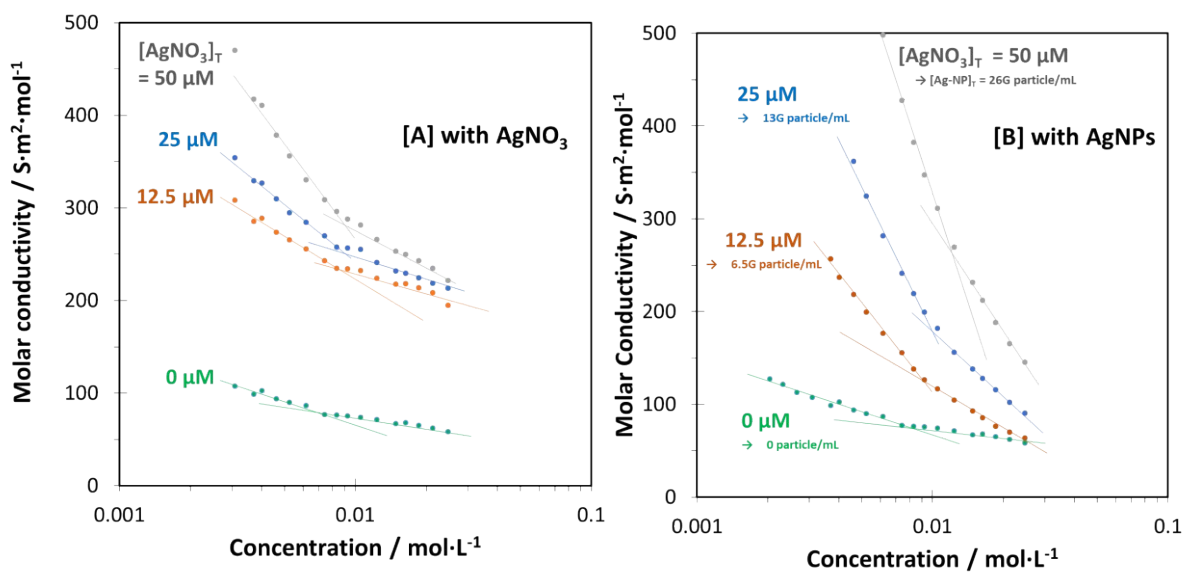

Fig. S6 The relationship between the  $C_{10}$ -APSO<sub>4</sub> surfactant and conductivity. Panel [A] shows the presence of different concentration of Ag<sup>+</sup> ions. Panel [B] shows the presence of different concentration of Ag-NP. The Ag-NPs was prepared in the condition of the labeled concentration of AgNO<sub>3</sub>.
